# Supplementary material for: Pateamine A-sensitive ribosome profiling reveals the scope of translation in mouse embryonic stem cells
Source: PubMed Central journal article supplement (PMC4712605; doi:10.1186/s12864-016-2384-0), 2016-01-14

# **Pateamine A-sensitive ribosome profiling reveals the scope of translation in mouse embryonic stem cells**

Alexandra Popa, Kevin Lebrigand, Pascal Barbry<sup>†</sup>, Rainer Waldmann

CNRS, Institut de Pharmacologie Moléculaire et Cellulaire, UMR-7275, France.

University Nice-Sophia-Antipolis, Sophia-Antipolis, France.

<sup>†</sup>To whom correspondence should be addressed ([barbry@ipmc.cnrs.fr](mailto:barbry@ipmc.cnrs.fr))

## **Supplementary Information**

## Supplementary Figures

### Figure S1. Calibration of the Ribosome P-site position and reproducibility

A, Highly translated annotated protein coding sequences with more than 2500 ribosome footprints ( $n = 871$ ) were selected and the footprint read starts were summed for positions flanking the annotated translation start and stop codons separately for match lengths between 26 and 40 bases. For match lengths of above 36 nucleotides, the triplet pattern around the AUG start and the stop codon degrades, suggesting that those reads are not footprints of translating ribosomes. Only footprints of between 26 and 36 nucleotides were selected for further analysis. The reason for the pronounced peak at the AUG start codon is, that the highly expressed transcripts include most Histones which typically have a pronounced footprint peak at this position.

B,C, Match start positions for ribosome footprints between 26 and 36 nucleotides were offset by 14 nucleotides and the cumulated read counts for those corrected positions are shown around the translation start (B) and stop (C) codon. The inset in (B) shows a value axis zoom for the transcript positions between 12 and 100 nucleotides after the AUG start codon.

D, Histogram showing RNase resistant footprint densities (reads / nucleotide) on the 5' UTR, the CDS and the 3' UTR. Data are for 4069 transcripts that have at least 500 ribosome footprints on the CDS. The footprint densities are the ratios of the sum of ribosome footprints and sum of the 5' UTR , CDS or 3' UTRs lengths.

E, Biological replicates ( $n=2$ ) of both transcriptome and ribosome profiling samples are highly correlated.

Figure S1

**A**

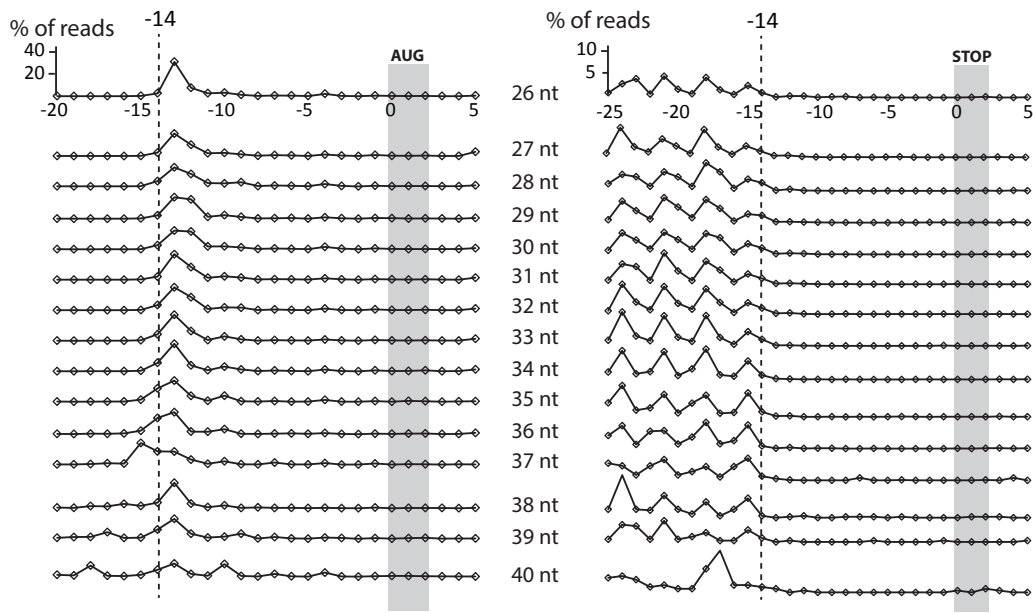

**B**

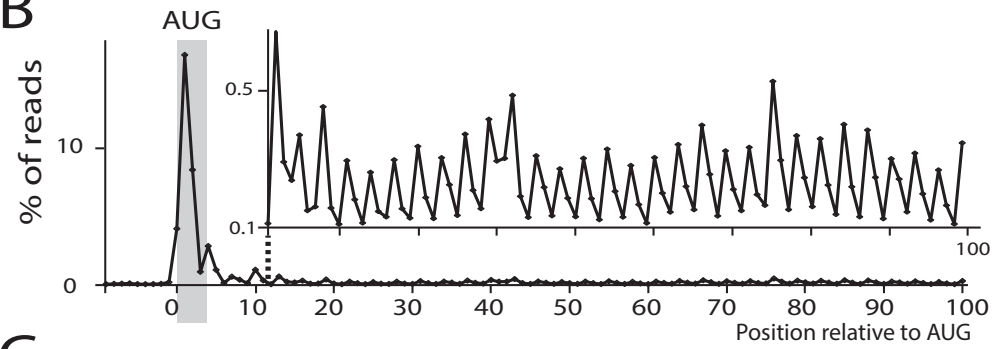

**C**

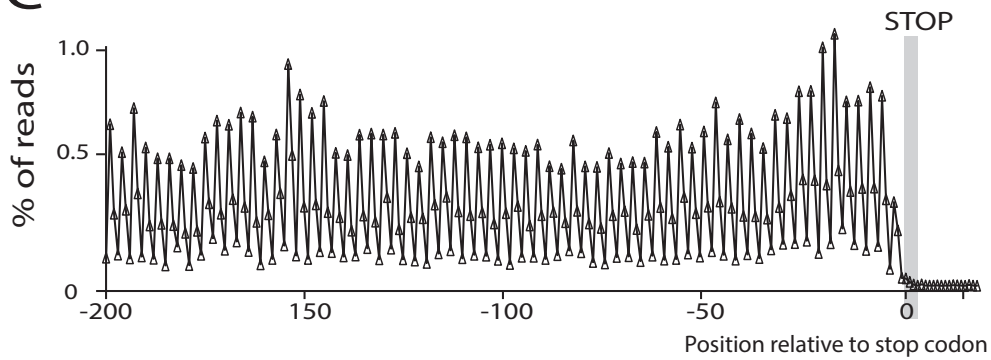

**D**

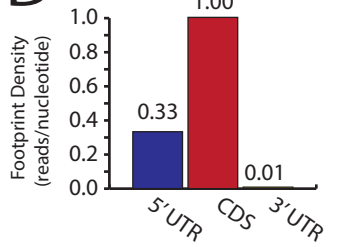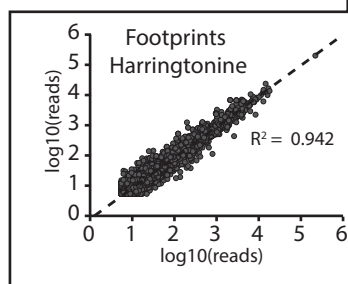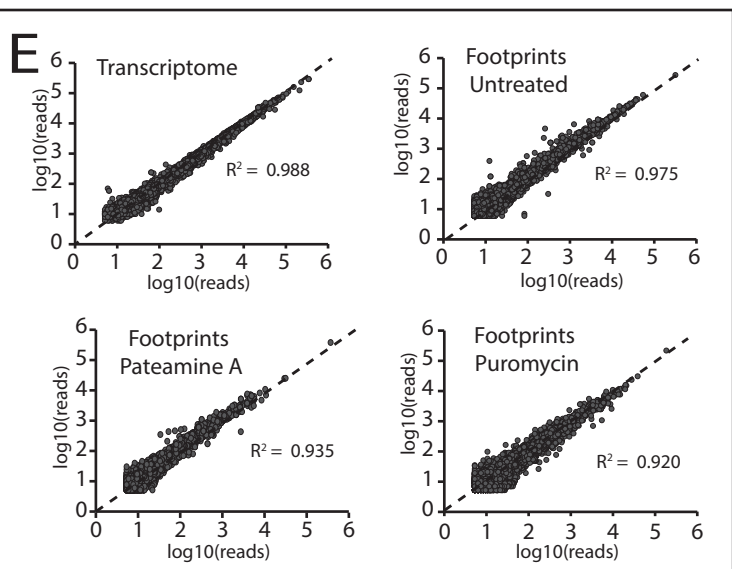

**Figure S2. Families of Protein Coding Transcripts Show Differential Sensitivity to Translation Inhibitors, extends Fig. 2.**

Cumulative frequency distribution of the effect of translation inhibitors on ribosome footprints for well expressed annotated protein coding sequences are shown for DMDA-Pateamine A (A), harringtonine (B), puromycin (C). Traces for the following types of mRNAs are shown: All protein coding transcripts (thick dark grey line), histones (blue), long CDS above 15 kb (purple), short 5' UTRs (<25 nt, yellow), long 5' UTRs (> 1 kb, red), transcripts with > 30% of the ribosome footprints of the control sample on the AUG initiation codon +/- 1 nucleotide (orange).

Data shown are from annotated coding sequences (Ensembl) that have at least 100 whole transcriptome reads and 100 ribosome footprints on their coding sequence (N = 8461).

Figure S2, extends Fig. 1

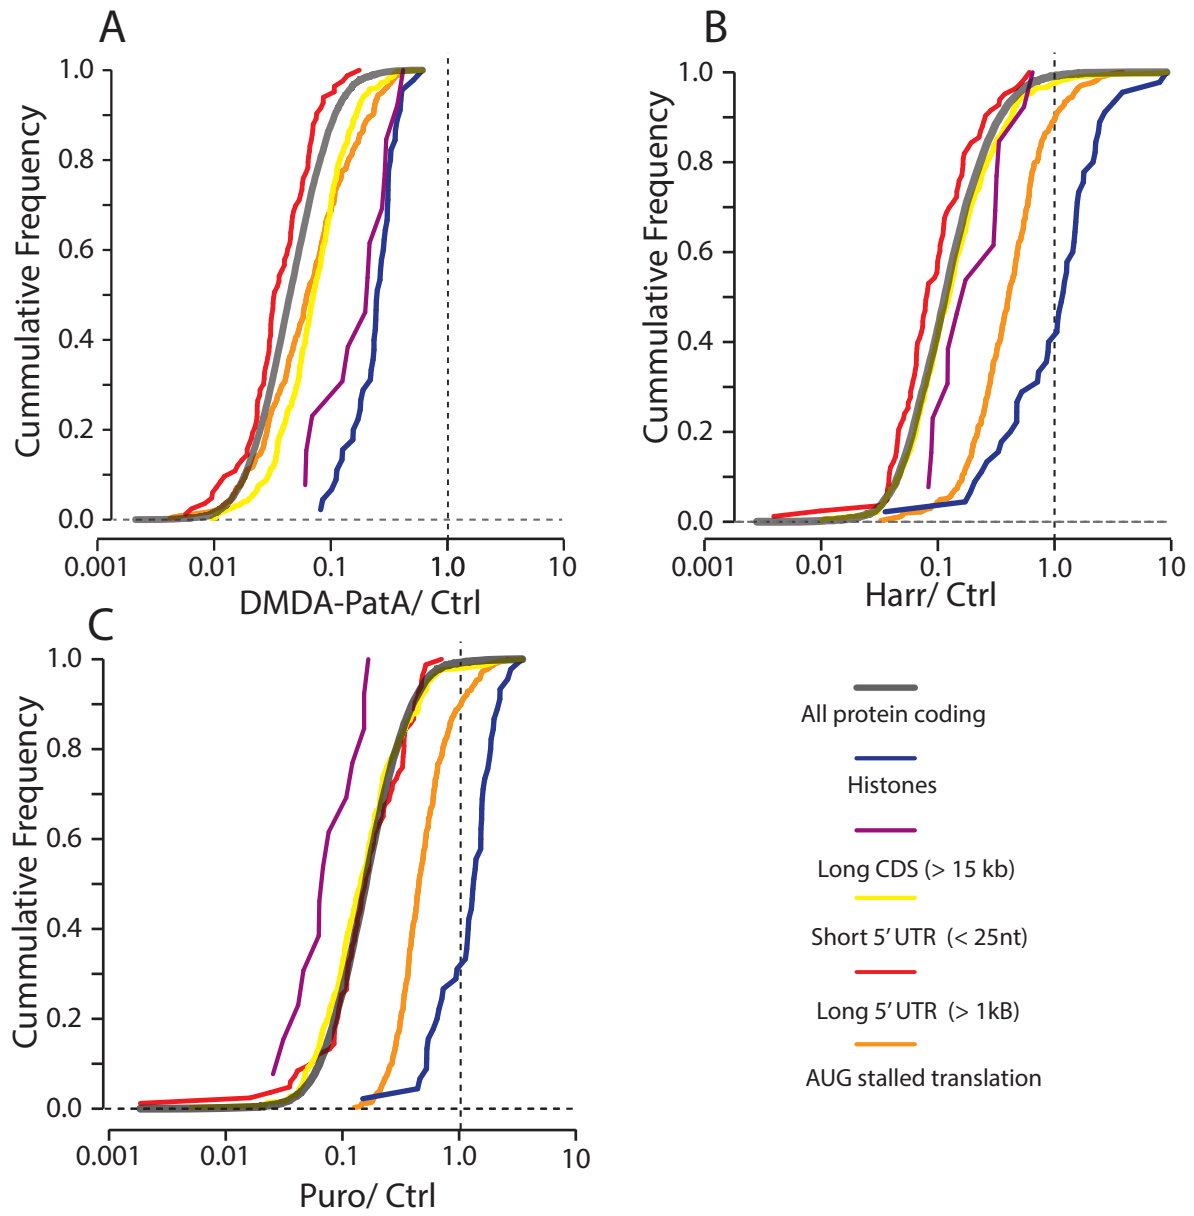

**Figure S3: Accumulation of Ribosome Footprints on the Translation start codon - effect of translation inhibitors.**

A, Relative ribosome density on the translation start codon. The mean per nucleotide density of ribosome footprints was calculated for each transcript for the translation start codon plus one flanking nucleotide on either side. The same was done for the entire coding sequence. The ratio of both ribosome footprint densities is a measure of above average ribosome accumulation around the translation start codon. Transcripts without ribosome footprints on the translation start codon (AUG +/- 1 nucleotide) represent 21.3%, 22.3%, 34.13% and 22.5% of the Control (Ctrl), harringtonin (Harr), DMDA-Pateamine A (DMDA-PatA) and puromycin (Puro) samples respectively.

B, Cumulative frequency plots of the ratios of ribosome footprints in the presence and absence of a translation inhibitor are shown for the entire coding sequence (CDS) and for the translation start codon +/- 1 nucleotide.

Only data for annotated coding transcripts with at least 500 ribosome footprints (n = 4041) are shown in A and B. In B, transcripts without ribosome footprints on the startcodon (+/- 1 nucleotide) in the control sample (n = 859) were omitted in all traces and transcripts without footprints on the start codon in the drug treated sample (harringtonine, 157; DMDA-Pateamine A, 549; puromycin, 44) were omitted in the corresponding trace.

C, Effect of translation inhibitors on ribosome footprints on the Hist3h2a transcript. The inset shows a zoom onto the region flanking the translation start codon.

D, Effect of translation inhibitors on ribosome footprints on the Jun transcript. The inset shows a zoom onto the region flanking the translation start codon. The first AUG codon at nt. 952 is the annotated coding sequence start. Pile-up of ribosome footprints at the AUG start codon at nt. 964 suggests that translation of Jun rather starts at this downstream initiation codon.

Figure S3

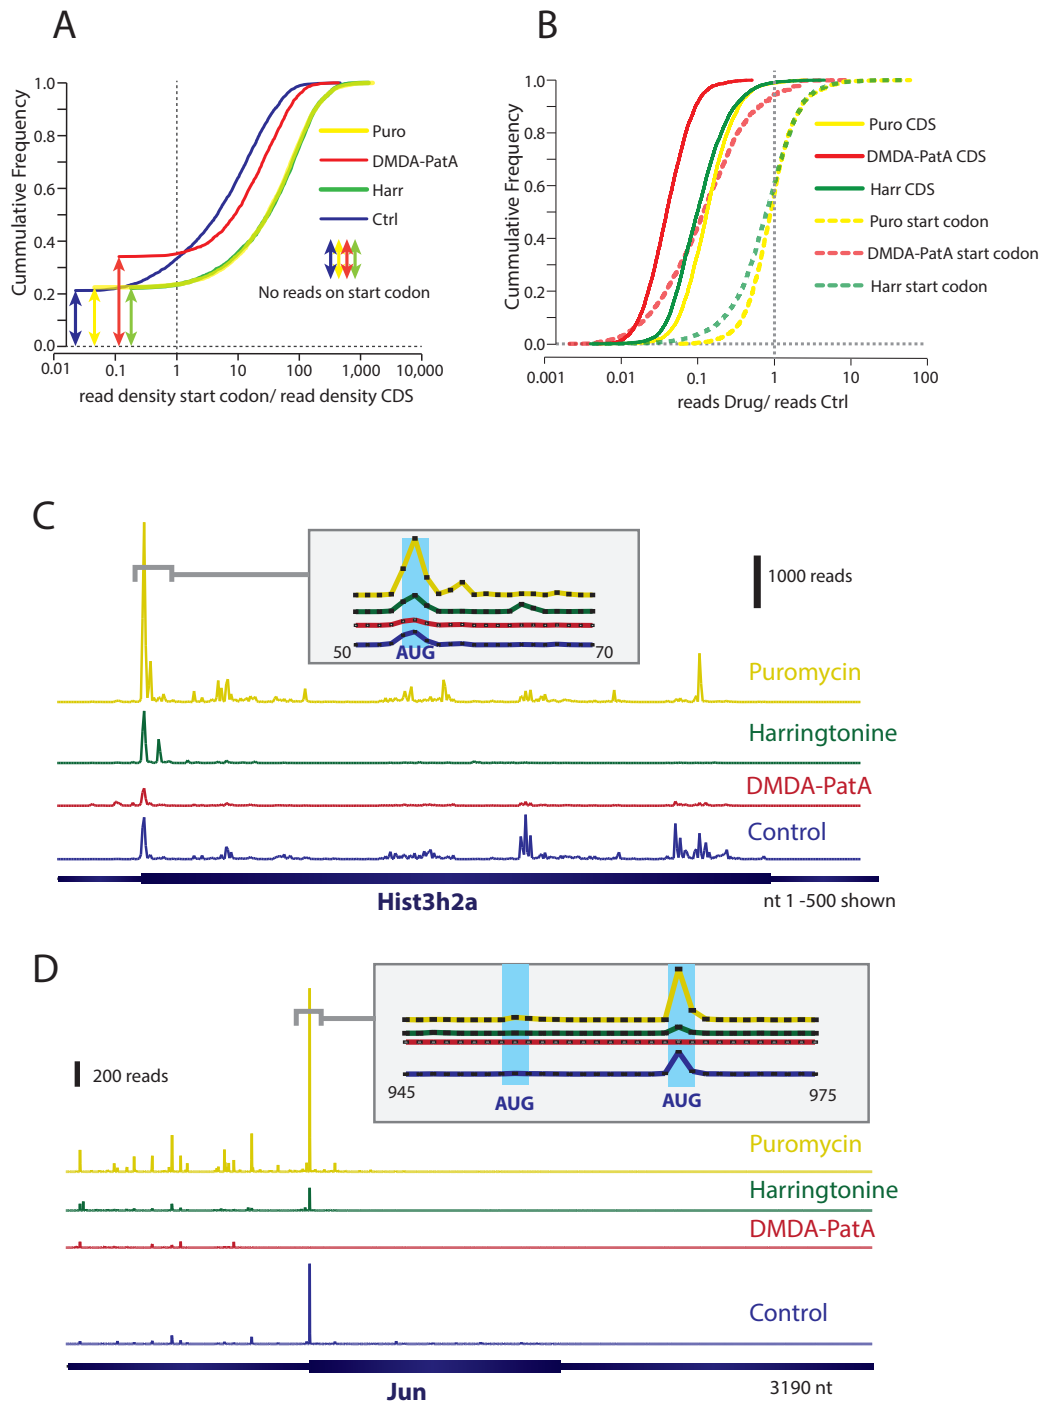

**Figure S4: Translation inhibitors do not affect footprints on structural RNAs.**

Ribosome footprint profiles and effects of translation inhibitors are shown for: the sno RNA Snora44, the RNA component of the mitochondrial RNase Rmp, the telomerase RNA component Terc.



Figure S4

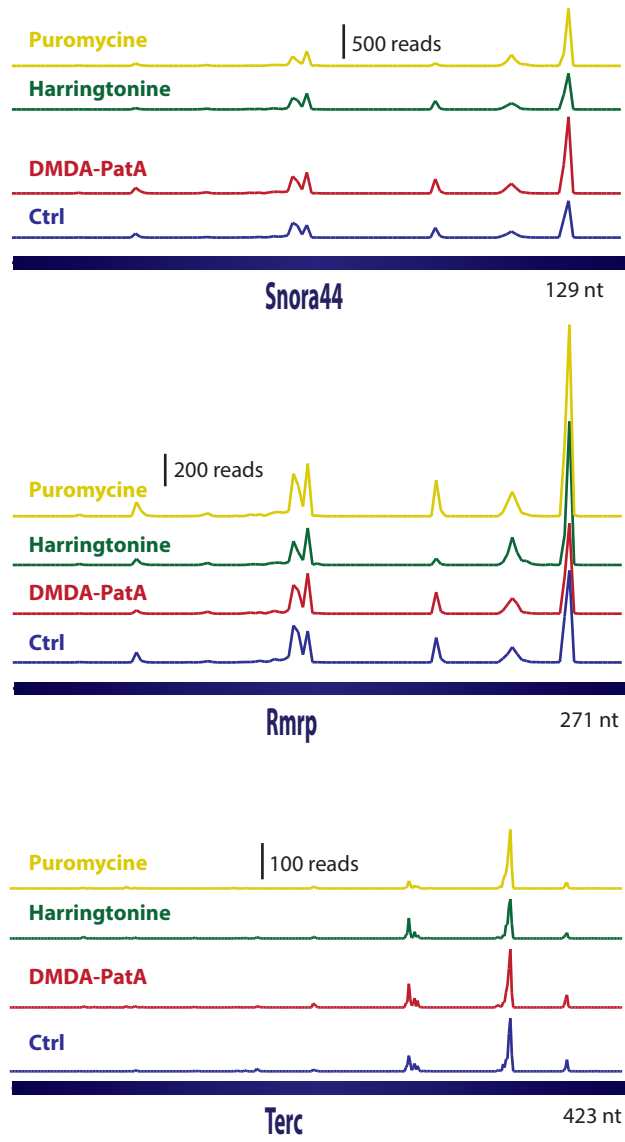

**Figure S5: Effect of translation inhibitors on noncoding RNAs, extends Fig. 2.**

A, Cumulative frequency distribution of the fraction of puromycin resistant ribosome footprints for annotated protein coding sequences (black), annotated CDS smaller than 300 nucleotides (dark blue), CDS of low expressed protein coding transcripts sampled to the same mRNA expression distribution as lncRNAs (light blue), all ORFs of lncRNAs (red) and all ORFs of snoRNAs (yellow).

B, C, Cumulative frequency distribution of the fraction of DMDA-Pateamine A (B) or harringtonine (C) resistant footprints for entire annotated protein coding transcripts (dashed blue), the CDS of annotated protein coding transcripts (blue), entire lncRNA mRNAs (dashed red) and AUG ORFs on lncRNAs (red).

In A – C only data for transcripts with at least 20 transcriptome reads and more than 4 RNase resistant footprints on the ORF are shown. ORFs on lncRNAs are only shown if at least 10% of the RNase resistant footprints of the entire transcript are located on the ORF.

Figure S5, extends Figure 2

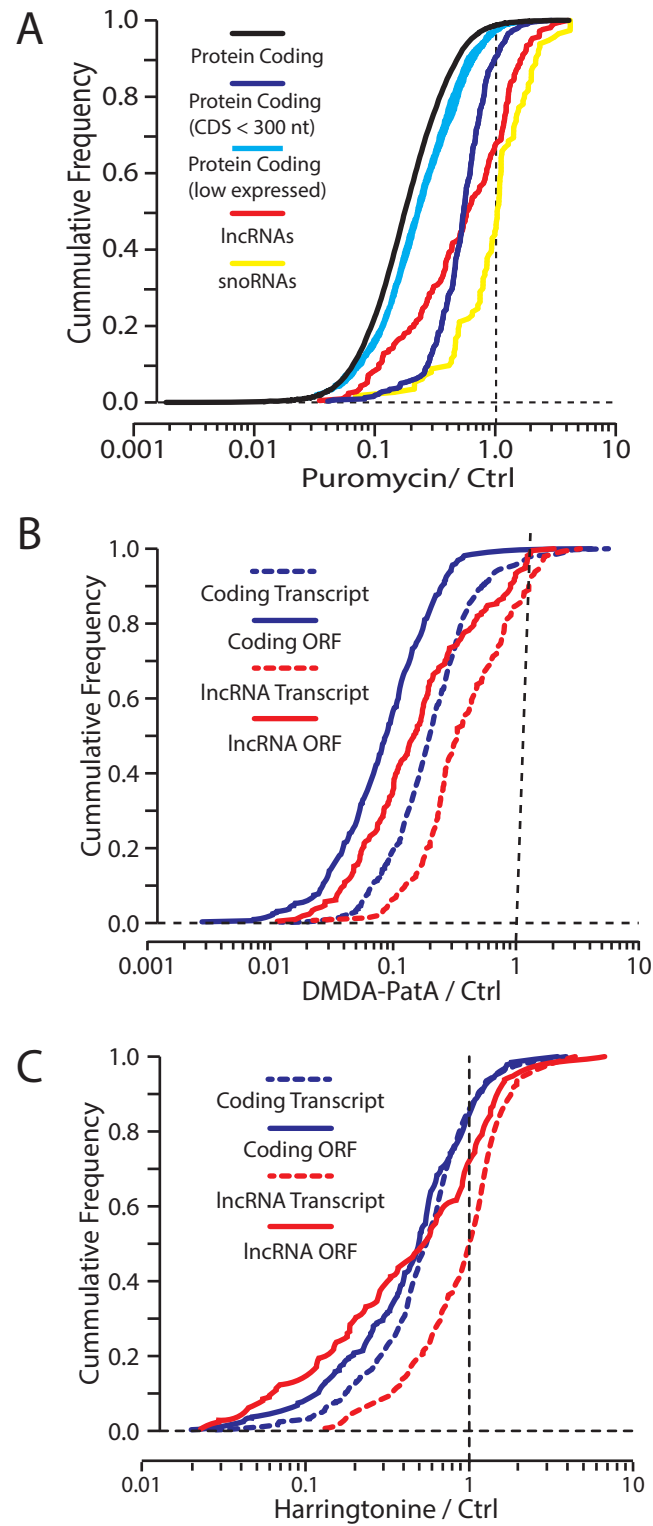

**Figure S6: Comparison of Pateamine A and bioinformatics scoring schemes Extends Fig. 2**

A, B, E, H Scatter plots of the DMDA-Pateamine A inhibition of ribosome footprints (A), the RR-score (B), ORF score (E) and Floss score (H) versus the number of footprints on the ORF.

D, Cumulative frequency distribution of RR-score of annotated coding transcripts (black), snoRNAs (yellow) and lncRNAs (red). For RR-score calculation either the entire 3'UTR (dashed lines,  $RRS_{end}$ ) or the 3' UTR until the AUG following the stop codon (solid lines,  $RRS_{AUG}$ , see Methods section) was used.

Other panels, Scatter plots showing pairwise comparisons of bioinformatics scoring and DMDA-Pateamine A inhibition.

Arrows in scatter plots indicate whether increasing or decreasing score indicates increased coding potential.

Transcript and ORF selection was as for Fig. S5.

Figure S6

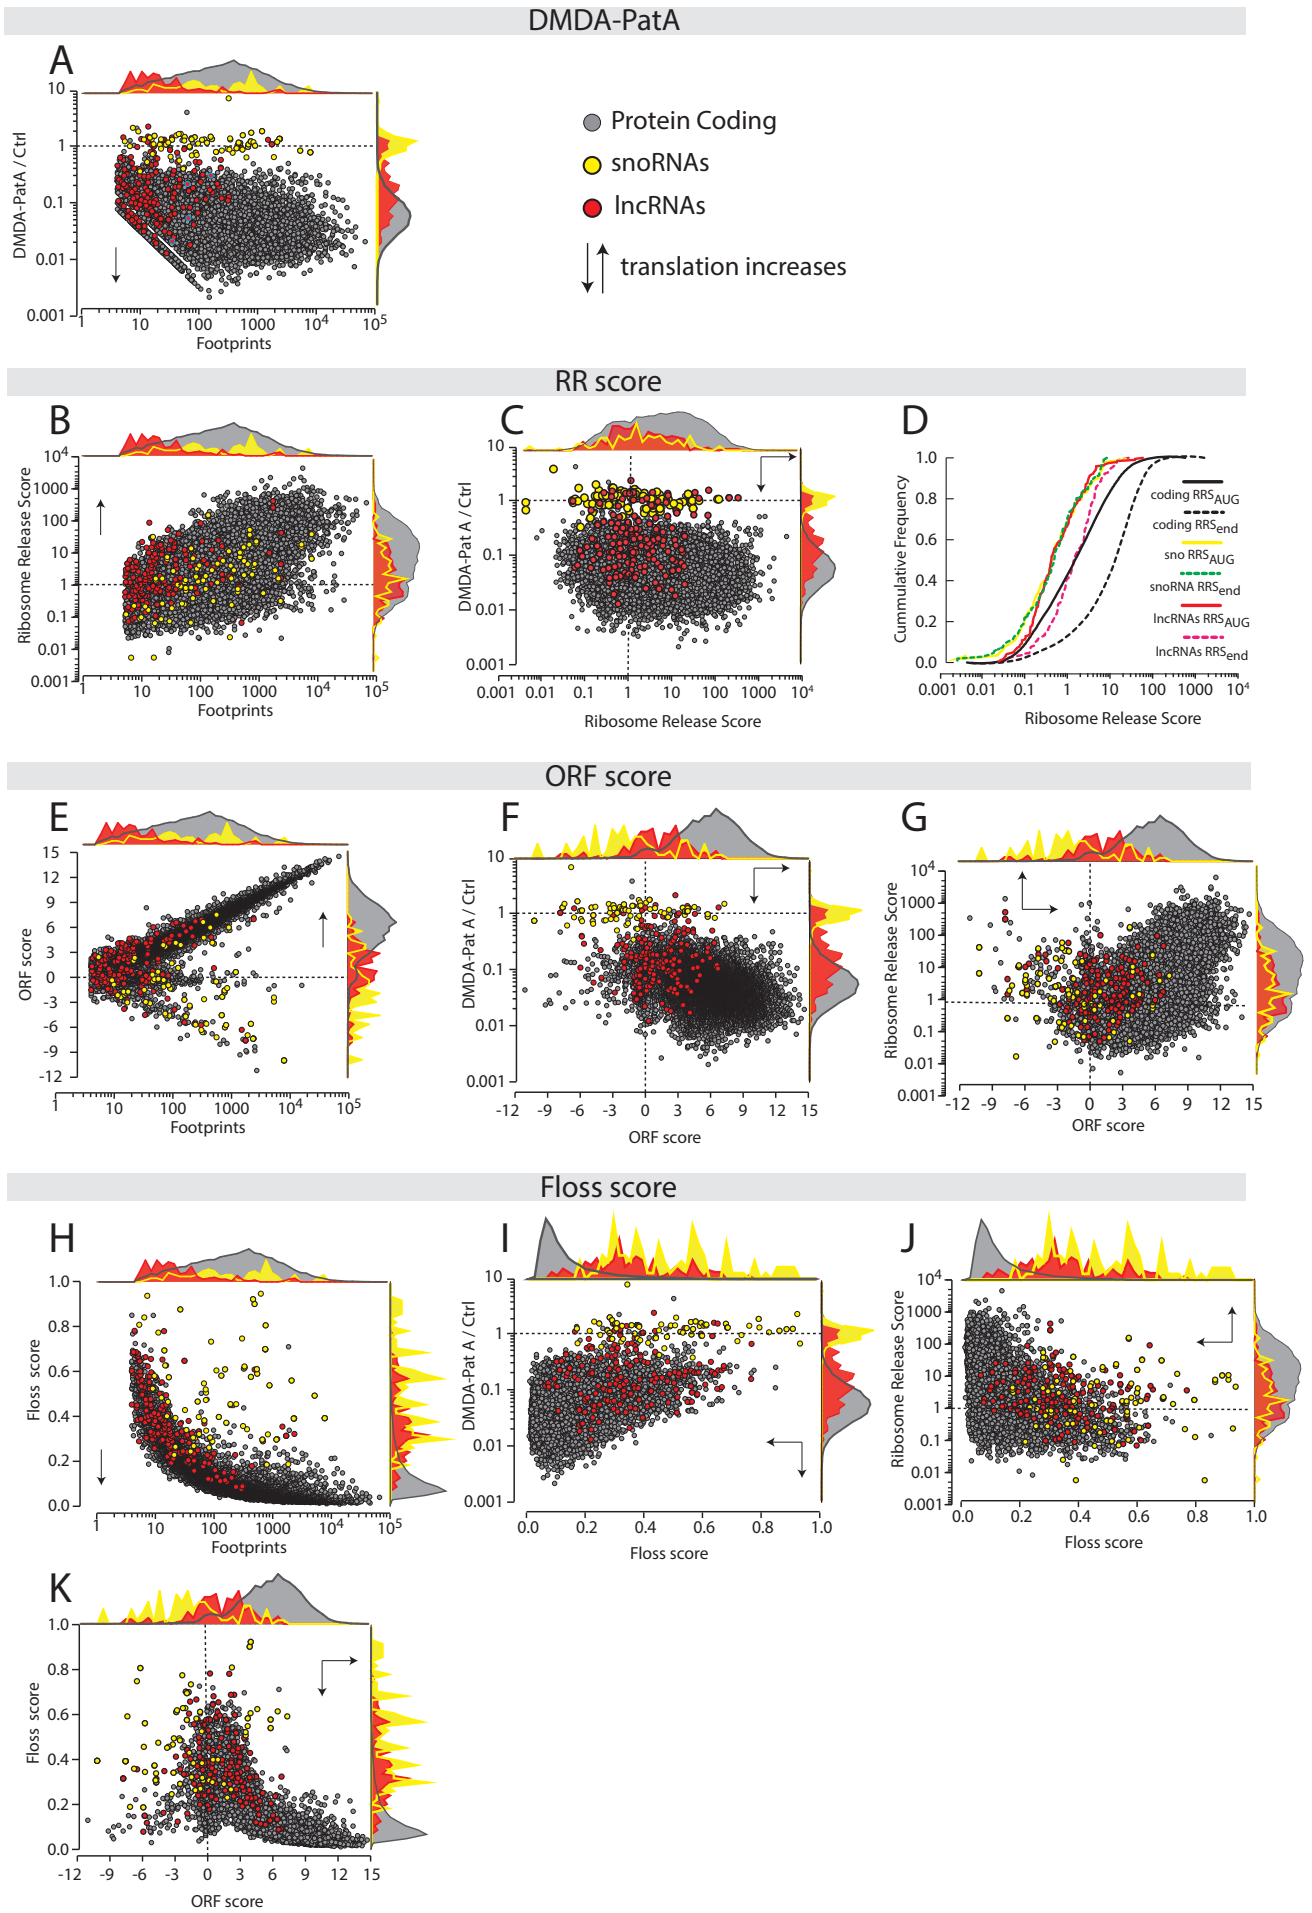

**Figure S7: Drug sensitive ribosome footprints on the lncRNAs Gm14074 and 1500011K16Rik.**

A, Five short ORFs on the lncRNA Gm14074 have ribosome footprint peaks located exactly on the AUG start codons. While footprints on ORF1 which codes just for one amino acid is only weakly affected by DMDA-Pateamine A, footprints on ORFs 2 – 5 are efficiently blocked by DMDA-Pateamine A. ORF1, 59 – 61; ORF2: 85 -183; ORF3: 191 – 262; ORF4: 275 – 313; ORF5: 349 – 363.

B, DMDA-Pateamine A sensitive ribosome footprints accumulate on a 148 nt ORF of the lncRNA 1500011K16Rik.

Figure S7

**A**

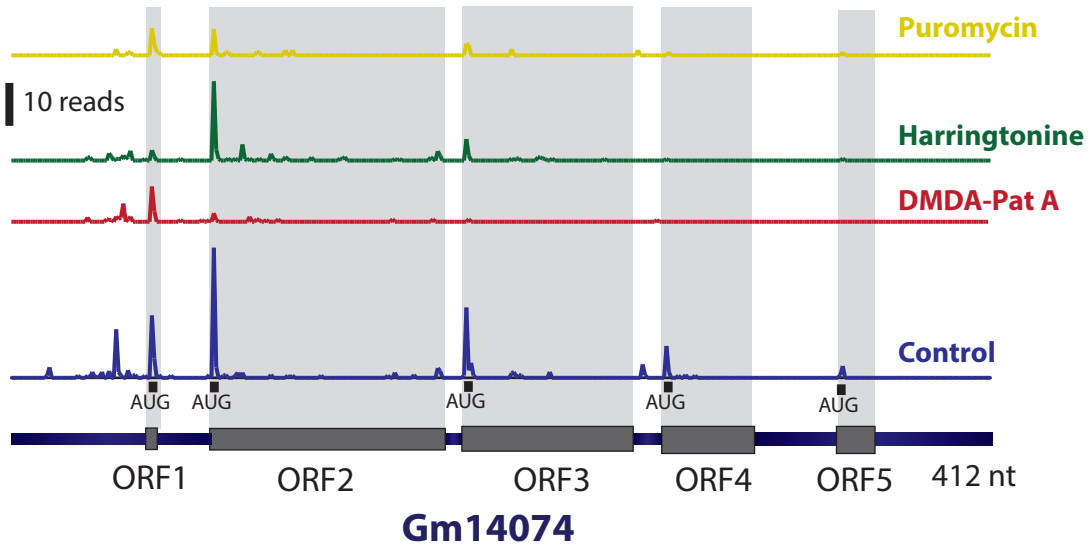

**B**

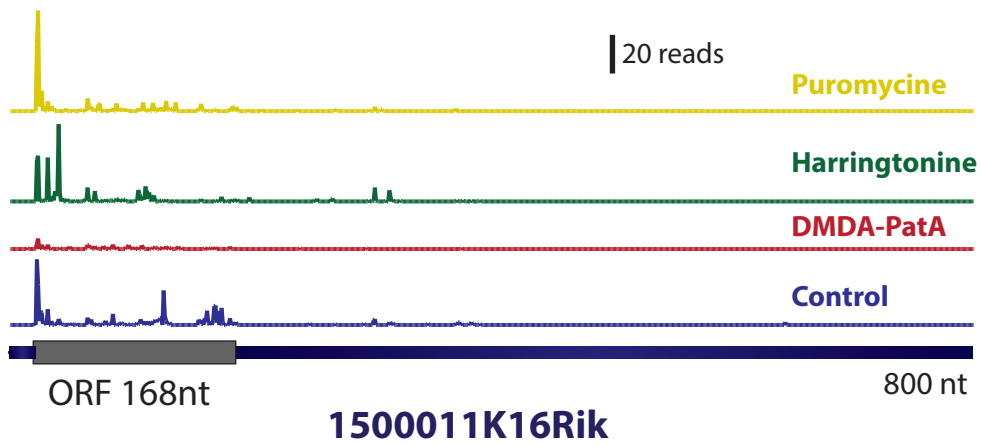

**Figure S8: Translated open reading frame in the snoRNA host gene encoded transcript Gas5.**

B, Ribosome footprints on the Gas5 mRNA in the absence and presence of translation inhibitors. No inhibitor, blue; DMDA-Pateamine A, red; harringtonine, green and puromycin, yellow.

A, (B) zoomed onto the principal open reading frame of Gas5.

C, Gas5 gene with intronic snoRNAs.

D, For snoRNAs with more than 20 RNase resistant footprints, the distribution of those reads on the respective snoRNA and the effect of DMDA-Pateamine A are shown.



Figure S8

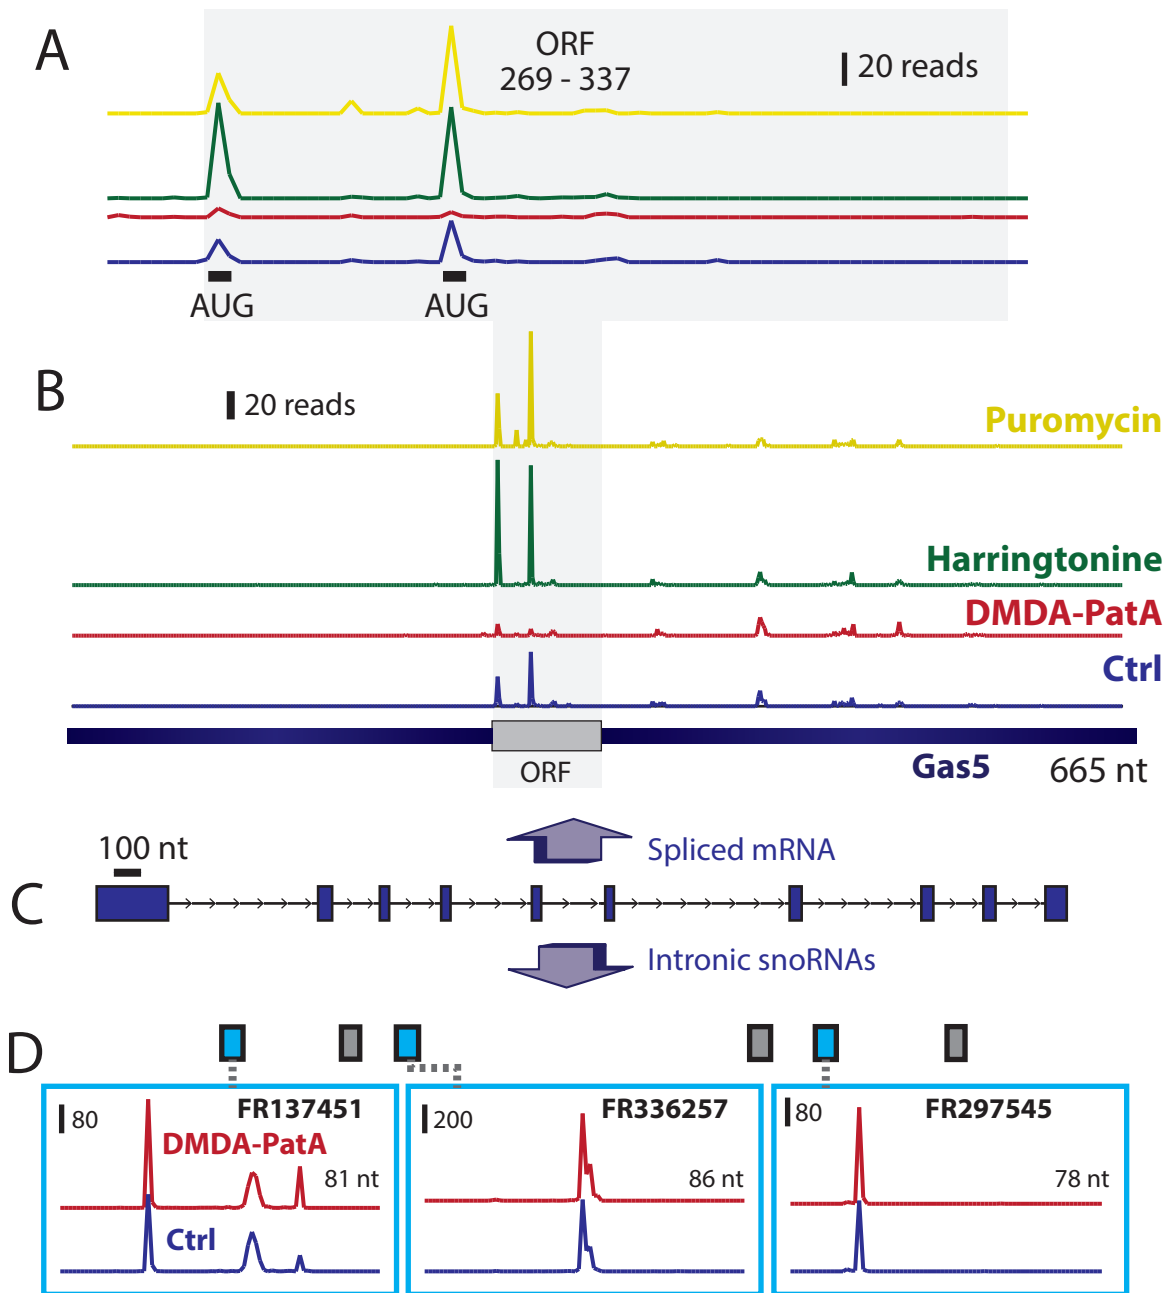

**Figure S9: Scoring of uORF quality.**

We visually inspected the ribosome footprint profiles and the effects of translation inhibitors and blind scored the quality of uORFs as outlined in the figure. The footprint profiles shown are from our viewer software (<http://caire.ipmc.cnrs.fr/RibosomeProfileViewer/GB/>).

Figure S9

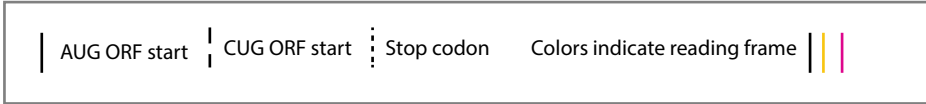

**Score 10**

clearly delimited footprint pattern covering the ORF. Footprints on the start codon allows identification of ORF start. Little or no signal on sequences flanking the ORF.

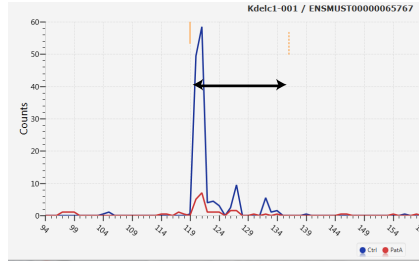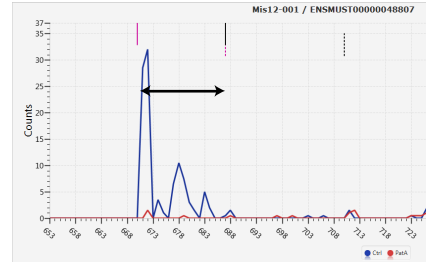

**Score 8**

As score 10 but less pronounced footprint pattern throughout the ORF than score 10.

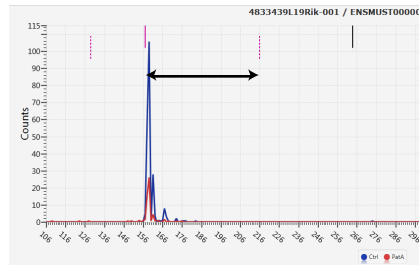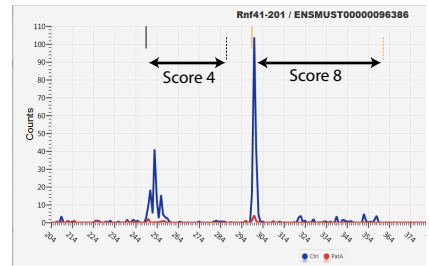

**Score 6**

Less pronounced footprint pattern throughout the ORF than score 8. And / Or increased signal on sequences flanking the ORF. Yet, footprint patterns can still be attributed clearly to one ORF.

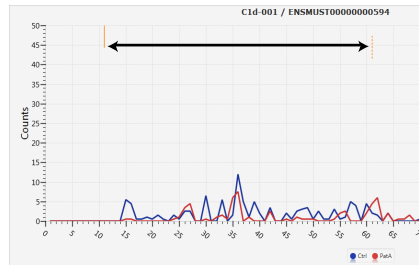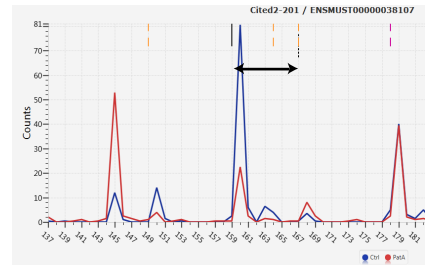

**Score 4**

More noise flanking ORF. Pattern less well attributable to one ORF than Score 6

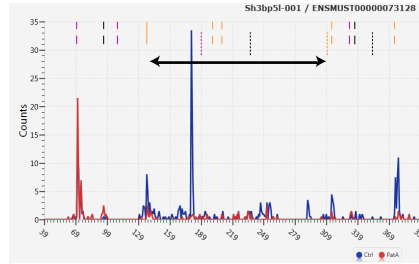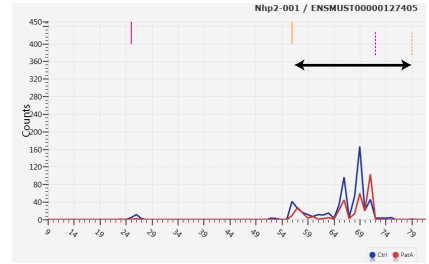

**Score 2**

5'UTR signal consistent with translation but cannot be clearly attributed to one ORF.

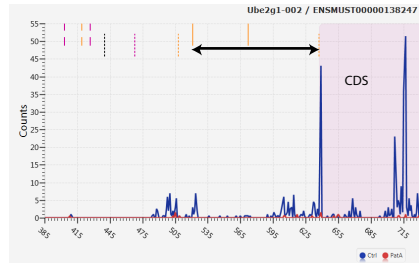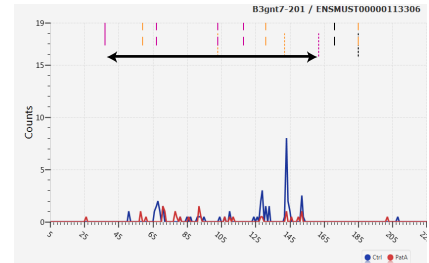

**Score 0**

Footprints belong clearly to other ORF

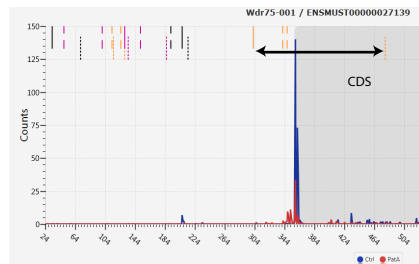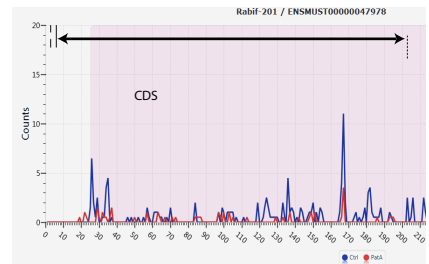

**Figure S10: Two translated uORFs in the ES cell pluripotency transcription factor Nanog.**

A, Distribution of ribosome footprints on the Nanog mRNA (blue) and inhibition by the translation inhibitors DMDA-Pateamine A (red), harringtonine (green) and puromycin (yellow).

B, As (A) zoomed onto the 5' UTR and the 5' end of the annotated coding sequence. The two uORFs are shaded blue and the start of the annotated coding sequence is marked with a red bar.

C,D, Enlarged view of the 3 amino acid CUG uORF (C) and the 7 amino acid AUG uORF (D) indicated in (B). The ribosome footprints are well blocked by DMDA-Pateamine A and only weakly affected by harringtonine and puromycin.

E, Ribosome footprints on the AUG initiation codon of the annotated coding sequence are as the uORFs well blocked by DMDA-Pateamine A and almost not affected by puromycin and harringtonin.

F, Major ribosome footprint peaks in the presence of harringtonine are located on the codons GTT and TTT. Codons are underlined.

Fig. S10

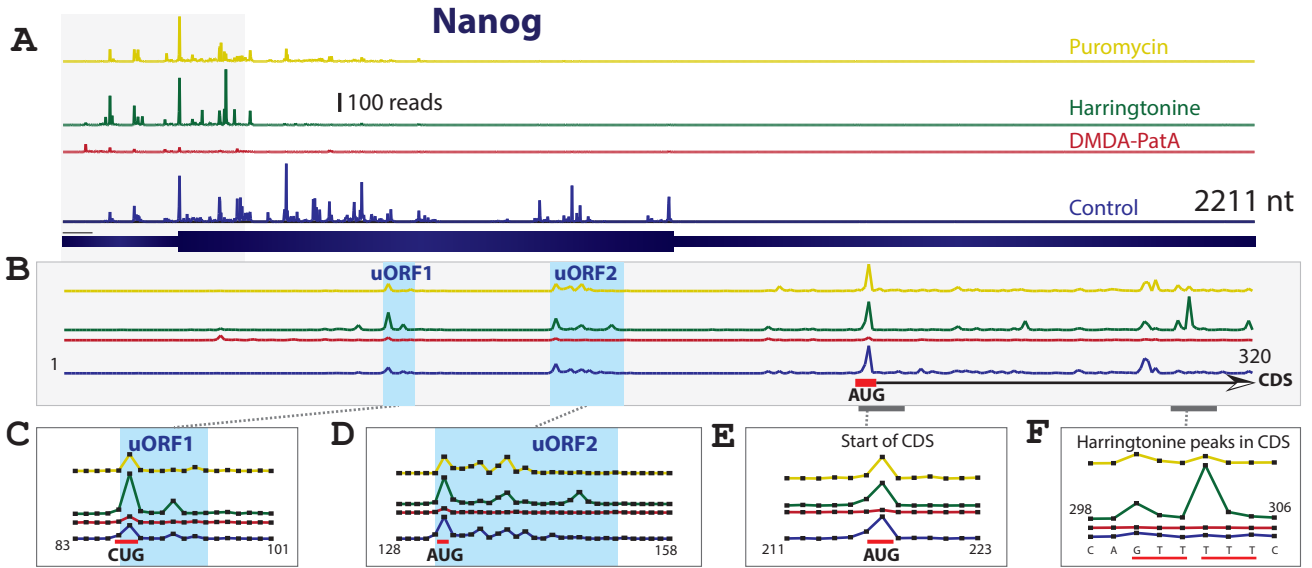

**Figure S11: Conservation of uORFs in transcripts of the ES cell pluripotency network.**

Schematic representation of the conservation of uORFs. The 5' UTRs and partial coding sequences are shown (arbitrary scale). Green boxes indicate uORFs that are conserved (start and stop codon) in the 60 way multiz alignment of vertebrates (<http://hgdownload-test.sdsc.edu/goldenPath/mm10/multiz60way/>). Light green boxes indicate multiz aligned uORFs with either the start or stop codon shifted by less than 9 nucleotides. Those are multiz aligned ORFs that are slightly bigger or smaller. Orange boxes indicate uORFs that we identified by inspection of the transcript and which are not in the multiz alignment. Fainted 5' UTRs indicate that no Ensembl mRNA has a 5'UTR with at least 10% of the length of the 5' UTR of the mouse orthologue. Grayed species names and symbols indicate that assembly for this transcript is absent or only partial.

Data are shown for the following transcripts: A, CTCF, mouse ENSMUST00000005841 , human, shrew multiz data, chicken ENSGALT00000002811, xenopus ENSXETT00000034066, zebrafish ENSDART00000079139. B, Dicer1, mouse ENSMUST00000041987, human, shrew, chicken and xenopus multiz data, zebrafish multiz data (green boxes) and 5' UTR of ENSDART00000045881. C, Lin28b, mouse ENSMUST00000041987, other species multiz alignment. D, Trim71, mouse ENSMUST00000111816, human and chicken multiz data, shrew ENSSART00000011914 , xenopus ENSXETT00000011768, Zebrafish NM\_001301331.1.

ENS... Accession numbers are from Ensembl, NM.. accession numbers are from Genbank .

Figure S11 extends Figure 5

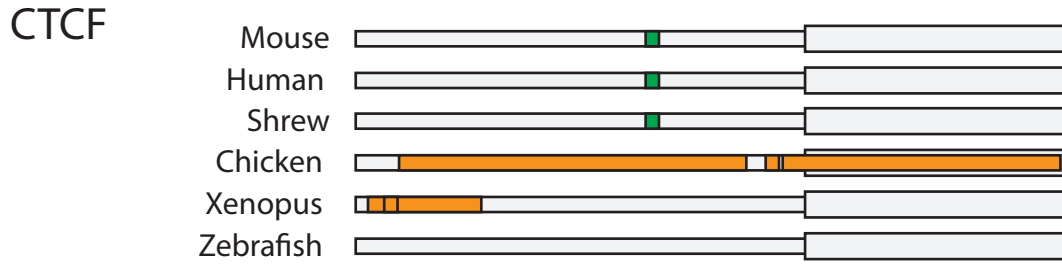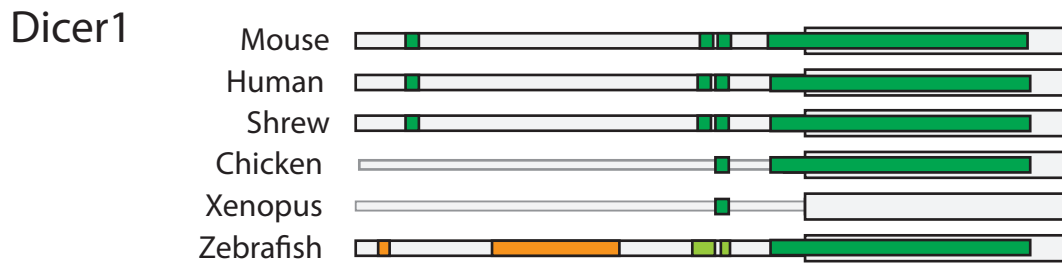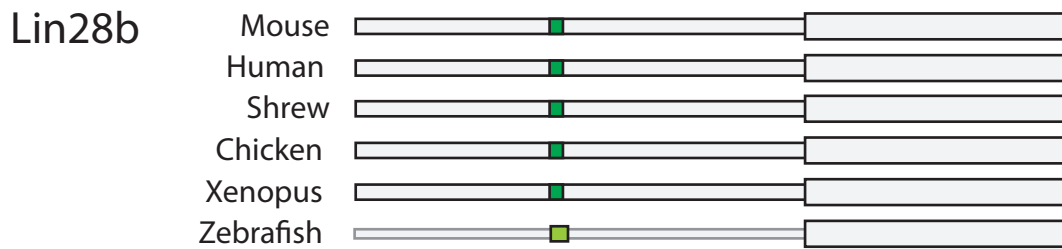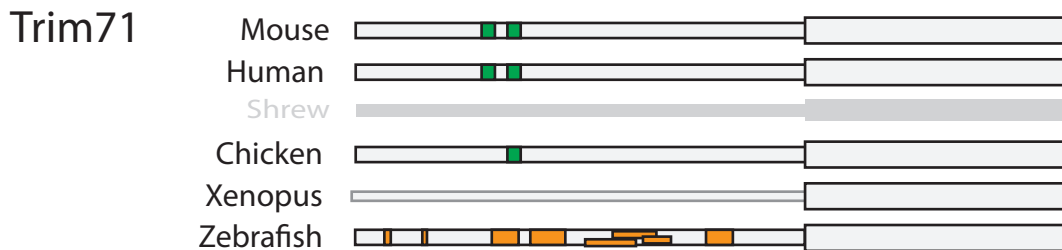

- ORF conserved in multi Z alignment
- Start or Stop conserved in Multi Z alignment, ORF length differs less than 9 nt. from mouse ORF
- ORF in 5' UTR of mRNA identified by inspection of the mRNA

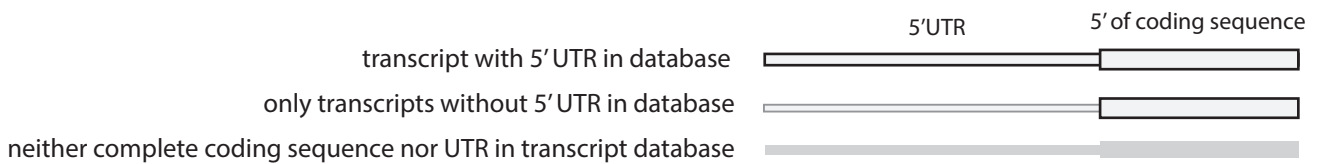

**Figure S12: A potential uORF with near-cognate UUG start codon**

Distribution of RNase resistant footprints on the Igfbp5 mRNA (blue) and inhibition by the translation inhibitors DMDA-Pateamine A (red), harringtonine (green) and puromycin (yellow).

The inset shows a zoom onto the region flanking a potential uORF (236 – 292) with a near cognate UUG start codon and a huge peak of DMDA-Pateamine A and harringtonine sensitive footprints on the UUG codon.



Figure S12

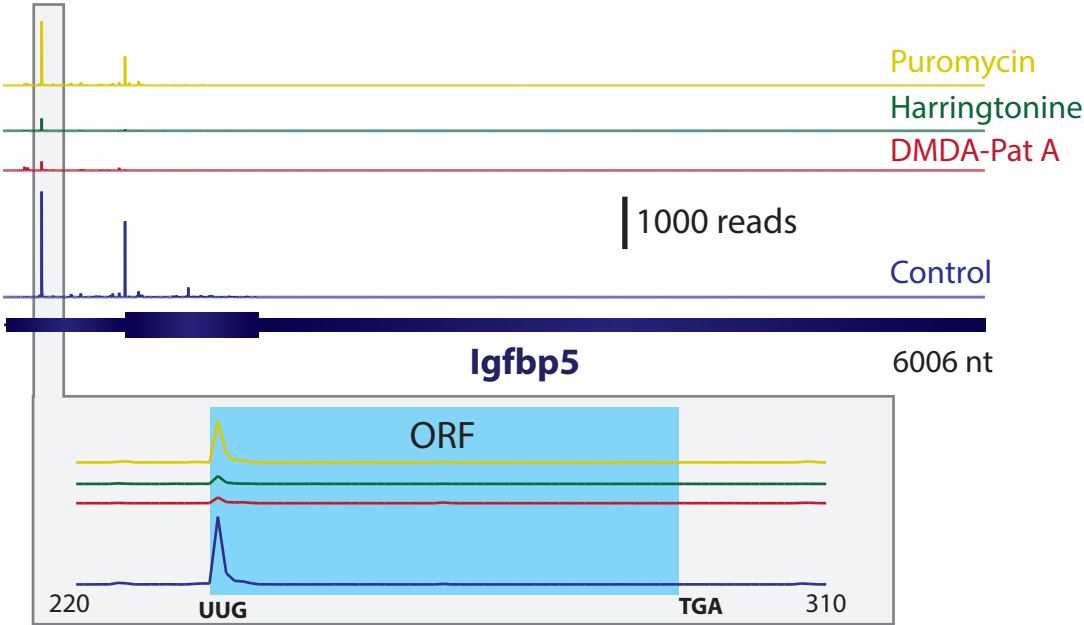

**Figure S13: Principal Functionalities of our Ribosome Profile Viewer software.**

A, main window with ribosome footprint profiles, annotated coding sequence and predicted ORFs. The mean match length distribution and information on the distribution of footprints on the different codon positions can be overlaid (for details see <http://caire.ipmc.cnrs.fr/RibosomeProfileViewer/GB/>).

B, Popup window with detailed information on an ORF. The following scores ( $\log_2$ ) are displayed: ORFscore, ORFscore where positions with more than 70% of the ORF's footprints were excluded (The score [13] introduced). TE-score, RR-score where the 3'UTR was truncated at the AUG following the stop codon, RR-score with the entire 3' UTR.

Figure S13

# Ribosome Profile Viewer Application

A

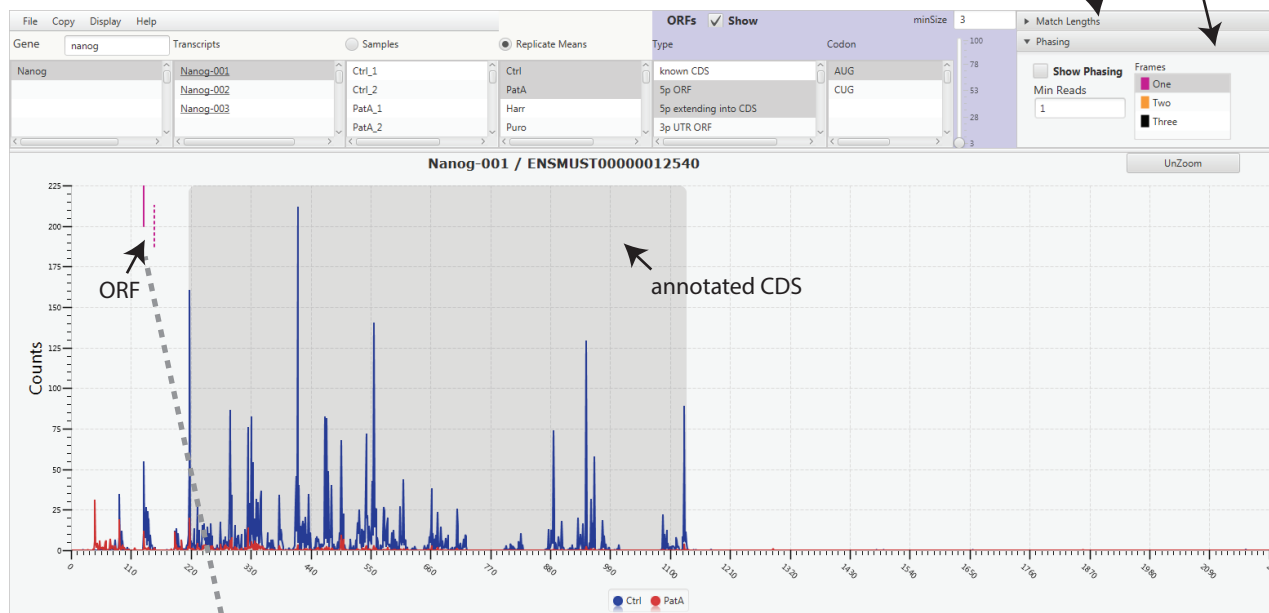

B

## ORF info

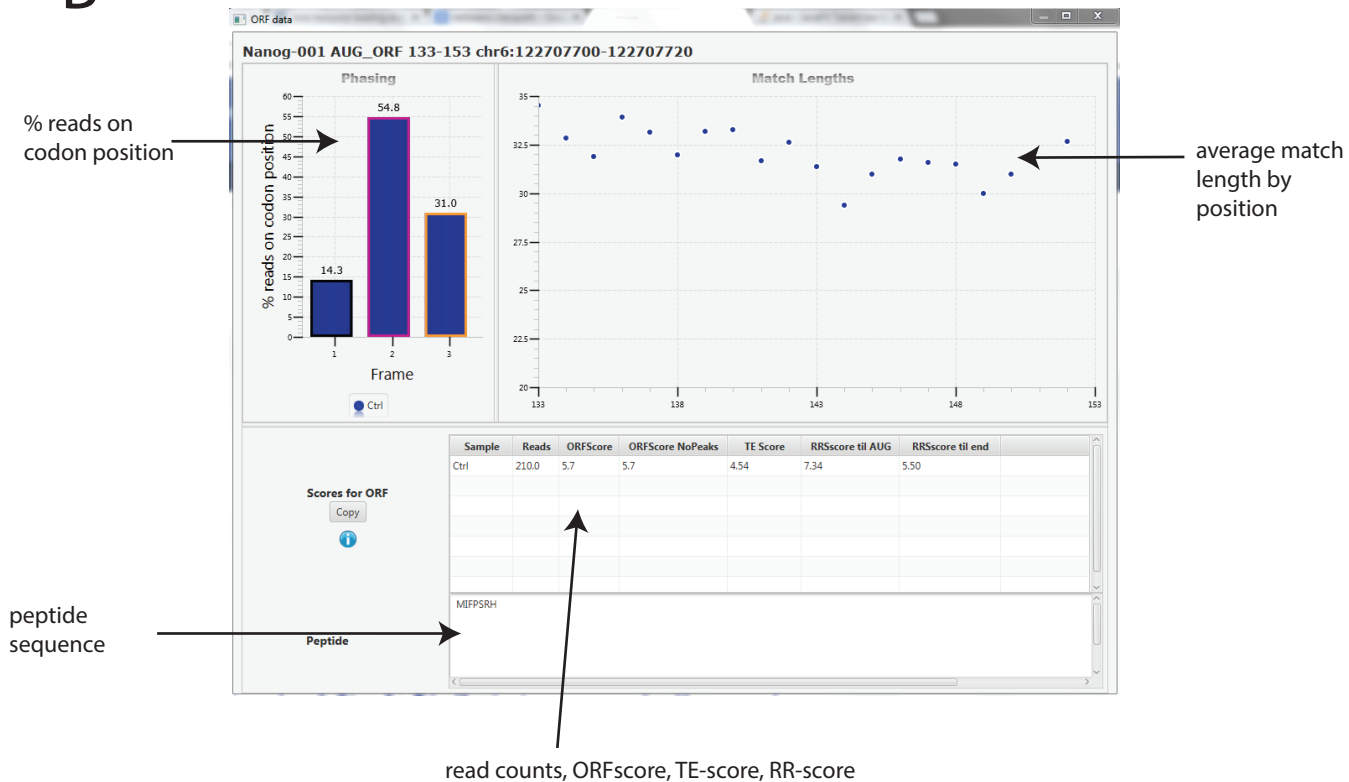

Supplement: 12864_2016_2384_MOESM1_ESM.pdf [file 12864_2016_2384_MOESM1_ESM.pdf]
